# Supplementary material for: High-performance organic thin-film phototransistors based on stacked p–n heterojunctions for enhanced optoelectronic response
Source: Royal Society of Chemistry journal article supplement (doi:10.1039/d4tc04467c), 2024-11-28
Supplement: d4tc04467c1.pdf [file d4tc04467c1.pdf]

# **High-Performance Organic Thin-Film Phototransistors Based on Stacked *p-n* Heterojunctions for Enhanced Optoelectronic Response**

Po-Hsiang Fang, Zhao-Lun Kuo, Yu-Tong Wu, Horng-Long Cheng, Wei-Yang Chou\*

Department of Photonics, National Cheng Kung University, Tainan 70101, Taiwan

**Table S1.** XRD diffraction analysis parameters of different semiconductor devices.

|                    | Device_N | Device_P | Device_T |
|--------------------|----------|----------|----------|
| $2\theta$ (degree) | 3.368    | 5.672    | 3.33     |
| FWHM (degree)      | 0.377    | 0.379    | 0.466    |
| $d$ -spacing (Å)   | 26.48    | 15.58    | 26.53    |

**Table S2.** Performances of OTFTs with different semiconducting materials and light irradiance.

| <b>Device</b>            | <b>on/off ratio</b> | <b><i>S.S.</i> (V/dec)</b> | <b><math>V_{TH}</math> (V)</b> | <b>Mobility (cm<sup>2</sup>/Vs)</b> |
|--------------------------|---------------------|----------------------------|--------------------------------|-------------------------------------|
| Device_N (Nonirradiated) | $2.74 \times 10^4$  | 0.66                       | 0.93                           | $3.35 \times 10^{-2}$               |
| Device_N (red light)     | $4.43 \times 10^4$  | 0.35                       | 1.09                           | $3.92 \times 10^{-2}$               |
| Device_N (Nonirradiated) | $1.74 \times 10^4$  | 0.93                       | 0.62                           | $2.24 \times 10^{-2}$               |
| Device_N (green light)   | $9.77 \times 10^2$  | 1.95                       | -0.04                          | $2.84 \times 10^{-2}$               |
| Device_N (Nonirradiated) | $3.28 \times 10^3$  | 1.32                       | 0.42                           | $1.90 \times 10^{-2}$               |
| Device_N (blue light)    | $7.19 \times 10^3$  | 1.08                       | 0.41                           | $2.55 \times 10^{-2}$               |
| Device_P (Nonirradiated) | $1.70 \times 10^2$  | 2.06                       | -0.61                          | $2.00 \times 10^{-4}$               |
| Device_P (red light)     | $6.62 \times 10^1$  | 1.90                       | -0.29                          | $3.81 \times 10^{-4}$               |
| Device_P (Nonirradiated) | $1.08 \times 10^2$  | 1.70                       | -0.54                          | $2.23 \times 10^{-4}$               |
| Device_P (green light)   | $1.73 \times 10^2$  | 1.72                       | -0.25                          | $3.12 \times 10^{-4}$               |
| Device_P (Nonirradiated) | $5.43 \times 10^2$  | 1.90                       | -0.38                          | $1.56 \times 10^{-4}$               |
| Device_P (blue light)    | $1.62 \times 10^1$  | 4.67                       | 0.66                           | $7.65 \times 10^{-5}$               |
| Device_T (Nonirradiated) | $4.93 \times 10^3$  | 0.46                       | 0.76                           | $6.40 \times 10^{-3}$               |
| Device_T (red light)     | $2.26 \times 10^2$  | 1.32                       | -0.12                          | $1.31 \times 10^{-2}$               |
| Device_T (Nonirradiated) | $1.85 \times 10^3$  | 0.51                       | 0.75                           | $5.41 \times 10^{-3}$               |
| Device_T (green light)   | $5.84 \times 10^1$  | 30.23                      | -2.61                          | $8.06 \times 10^{-3}$               |
| Device_T (Nonirradiated) | $1.52 \times 10^3$  | 0.75                       | 0.65                           | $1.21 \times 10^{-2}$               |

|                       |                    |      |       |                       |
|-----------------------|--------------------|------|-------|-----------------------|
| Device_T (blue light) | $1.44 \times 10^2$ | 3.13 | -2.33 | $7.39 \times 10^{-3}$ |
|-----------------------|--------------------|------|-------|-----------------------|

---

**Table S3.** Summary of the performance parameters of organic thin-film phototransistors.

| Material                                   | Semiconductor            | Voltage (V) | Light         | <i>P</i>             | <i>R</i> (A/W)        | Ref.      |
|--------------------------------------------|--------------------------|-------------|---------------|----------------------|-----------------------|-----------|
| EHPDI                                      | N-type                   | 80          | White         | 5.44                 | $24.5 \times 10^{-3}$ | 34        |
| CV/NaBH <sub>4</sub> -doped BPE-PTCDI      | N-type                   | 100         | polychromatic | 6                    | 89.03                 | 35        |
| diF-TES ADT                                | p-type                   | -40         | Green         | 115                  | 0.139                 | 36        |
| TIPS-pentacene                             | p-type                   | -10         | blue          | $\sim 4 \times 10^4$ | $17 \times 10^{-3}$   | 37        |
| (PDPPT3-HDO): COTIC-4F                     | heterojunction structure | $\pm 3$     | UV light      | $1.3 \times 10^5$    | $1.07 \times 10^{-3}$ | 38        |
| PTCDI-C <sub>13</sub>                      | N-type                   | 3           | Green         | 301.22               | $0.12 \times 10^{-3}$ | This work |
| Pentacene                                  | P-type                   | 3           | Red           | 17.03                | $0.01 \times 10^{-3}$ | This work |
| PTCDI-C <sub>13</sub> /Pentacene (6 layer) | heterojunction structure | $\pm 3$     | Green         | 5007.70              | $8.36 \times 10^{-3}$ | This work |

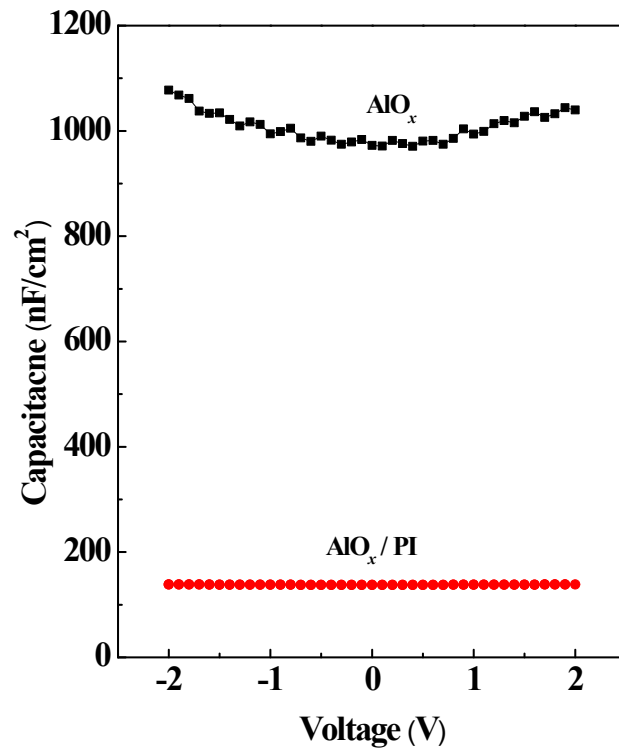

**Fig. S1** The capacitance values of the AlO<sub>x</sub> and PI/AlO<sub>x</sub> dielectric layers at a measurement frequency of 1 kHz.

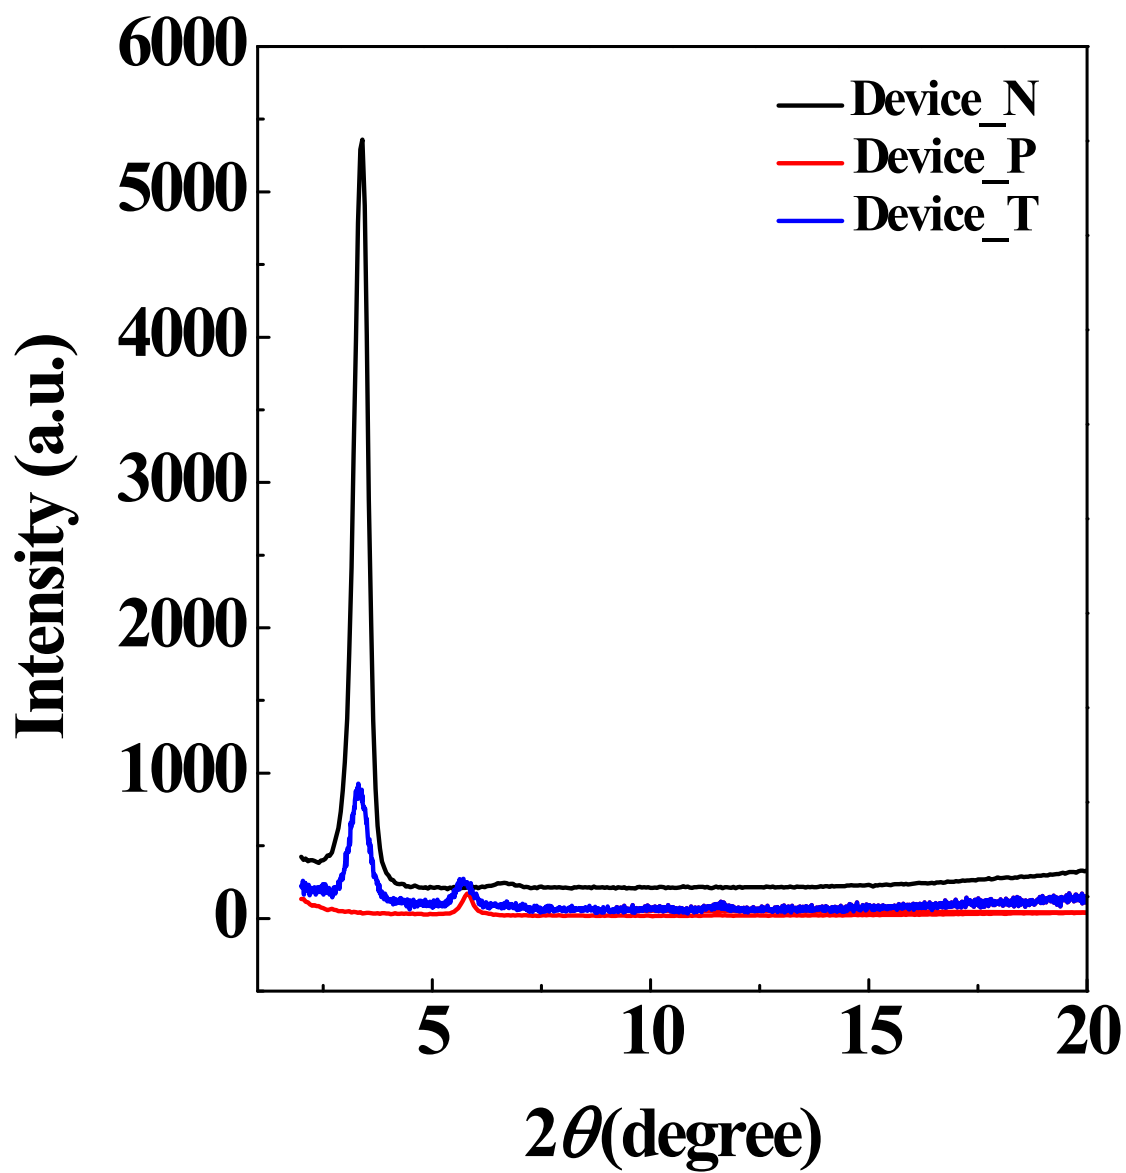

Fig. S2. XRD diffraction patterns of different semiconductor devices.
